# Supplementary material for: Association of Preoperative Diuretic Use With Early Acute Kidney Injury in Infants With Biventricular Hearts Following Cardiac Surgery
Source: PubMed Central journal article supplement — J Am Heart Assoc. 2021 Oct 8;10(20):e020519. doi: 10.1161/JAHA.120.020519 (PMC8751857; doi:10.1161/jaha.120.020519), 2021-10-08
Supplement: JAH3-10-e020519-s001.pdf [file JAH3-10-e020519-s001.pdf]

# **Supplemental Material**

**Table S1. KDIGO definition of AKI and AKI severity according to serum creatinine and urine output.**

| <b>Stage</b> | <b>Serum Creatinine</b>                                                                                                                                                                     | <b>Urine output</b>                                   |
|--------------|---------------------------------------------------------------------------------------------------------------------------------------------------------------------------------------------|-------------------------------------------------------|
| <b>1</b>     | 1.5-1.9 times baseline<br>Or<br>≥26.5 μmol/l increase                                                                                                                                       | <0.5 ml/kg/h for 6-12 h                               |
| <b>2</b>     | 2-2.9 times baseline                                                                                                                                                                        | <0.5 ml/kg/h for ≥ 12 hr                              |
| <b>3</b>     | 3 times baseline<br>Or<br>Increase serum creatinine more than<br>353.6 μmol/l<br>Or<br>Initiation of renal replacement therapy<br>Or<br>Decrease in eGFR <35 ml/min per 1.73 m <sup>2</sup> | <0.3 ml/kg/hr for ≥ 24 hr<br>Or<br>Anuria for ≥ 12 hr |

**Table S2. Distribution of double outlet right ventricle (DORV) and total anomalous pulmonary venous return (TAPVR) patients along with the use of pre-operative diuretics.**

| <b>Diagnosis</b>           | <b>Pre-operative diuretic use</b> | <b>No pre-operative Diuretic use</b> |
|----------------------------|-----------------------------------|--------------------------------------|
| <b>DORV</b>                |                                   |                                      |
| Subaortic VSD/TOF          | 1                                 | 7                                    |
| Subaortic VSD/Unobstructed | 7                                 | 3                                    |
| Subaortic VSD/PA           | 0                                 | 2                                    |
| Non-committed VSD          | 0                                 | 1                                    |
| Doubly committed VSD       | 0                                 | 0                                    |
| Sub-pulmonary VSD          | 0                                 | 0                                    |
| <b>TAPVR</b>               |                                   |                                      |
| Supracardiac               | 0                                 | 5                                    |
| Cardiac                    | 3                                 | 2                                    |
| Infracardiac               | 0                                 | 0                                    |
| Mixed                      | 1                                 | 1                                    |

Subaortic VSD/TOF, Tetralogy type double outlet right ventricle; Subaortic VSD/Unobstructed, ventricular septal defect type double outlet right ventricle; Subaortic VSD/PA, tetralogy type double outlet right ventricle with pulmonary atresia; VSD, ventricular septal defect

**Table S3. Distribution of AKI severity relative to the KDIGO criteria that was met to diagnose AKI.**

| <b>CS-AKI severity</b> | <b>n</b> | <b>Oliguria</b> | <b>SCr</b> | <b>Oliguria/SCr</b> |
|------------------------|----------|-----------------|------------|---------------------|
| <b>All</b>             | 149      | 17              | 122        | 10                  |
| <b>Stage 1</b>         | 80       | 15              | 57         | 8                   |
| <b>Stage 2</b>         | 57       | 2               | 53         | 2                   |
| <b>Stage 3</b>         | 12       | 0               | 12         | 0                   |

CS-AKI, cardiac surgery associated acute kidney injury; SCR, serum creatinine.

**Table S4. Mean age at surgery for each diagnosis.**

| <b>Diagnosis</b> | <b>Mean age at surgery m, (Stdev)</b> |
|------------------|---------------------------------------|
| TOF              | 6.9 (2.0)                             |
| AVSD             | 5.9 (2.1)                             |
| VSD              | 5.5 (1.9)                             |
| DORV             | 7.2 (2.6)                             |
| TOF/MAPCAs       | 5.7 (2.6)                             |
| TAPVR            | 3.4 (1.5)                             |
| TOF/AVSD         | 11.4 (0.4)                            |
| Other            | 6.3 (3.9)                             |

AVSD, atrioventricular septal defect; DORV, double outlet right ventricle; TOF, tetralogy of Fallot; TAPVR, total anomalous pulmonary venous return; TOF/AVSD, tetralogy of Fallot with atrioventricular septal defect; TOF/MAPCAs, tetralogy of Fallot with pulmonary atresia and multiple aortopulmonary collaterals; VSD, ventricular septal defect.
